# Supplementary material for: Improvement of Oxidative Stability and Microbial Shelf Life of Vanilla Cake by Coconut Oil Meal and Sesame Oil Meal Phenolic Extracts
Source: Hindawi journal article supplement (doi:10.1155/2019/1263629), 2019-11-22
Supplement: f1 [file 1263629.f1.docx]

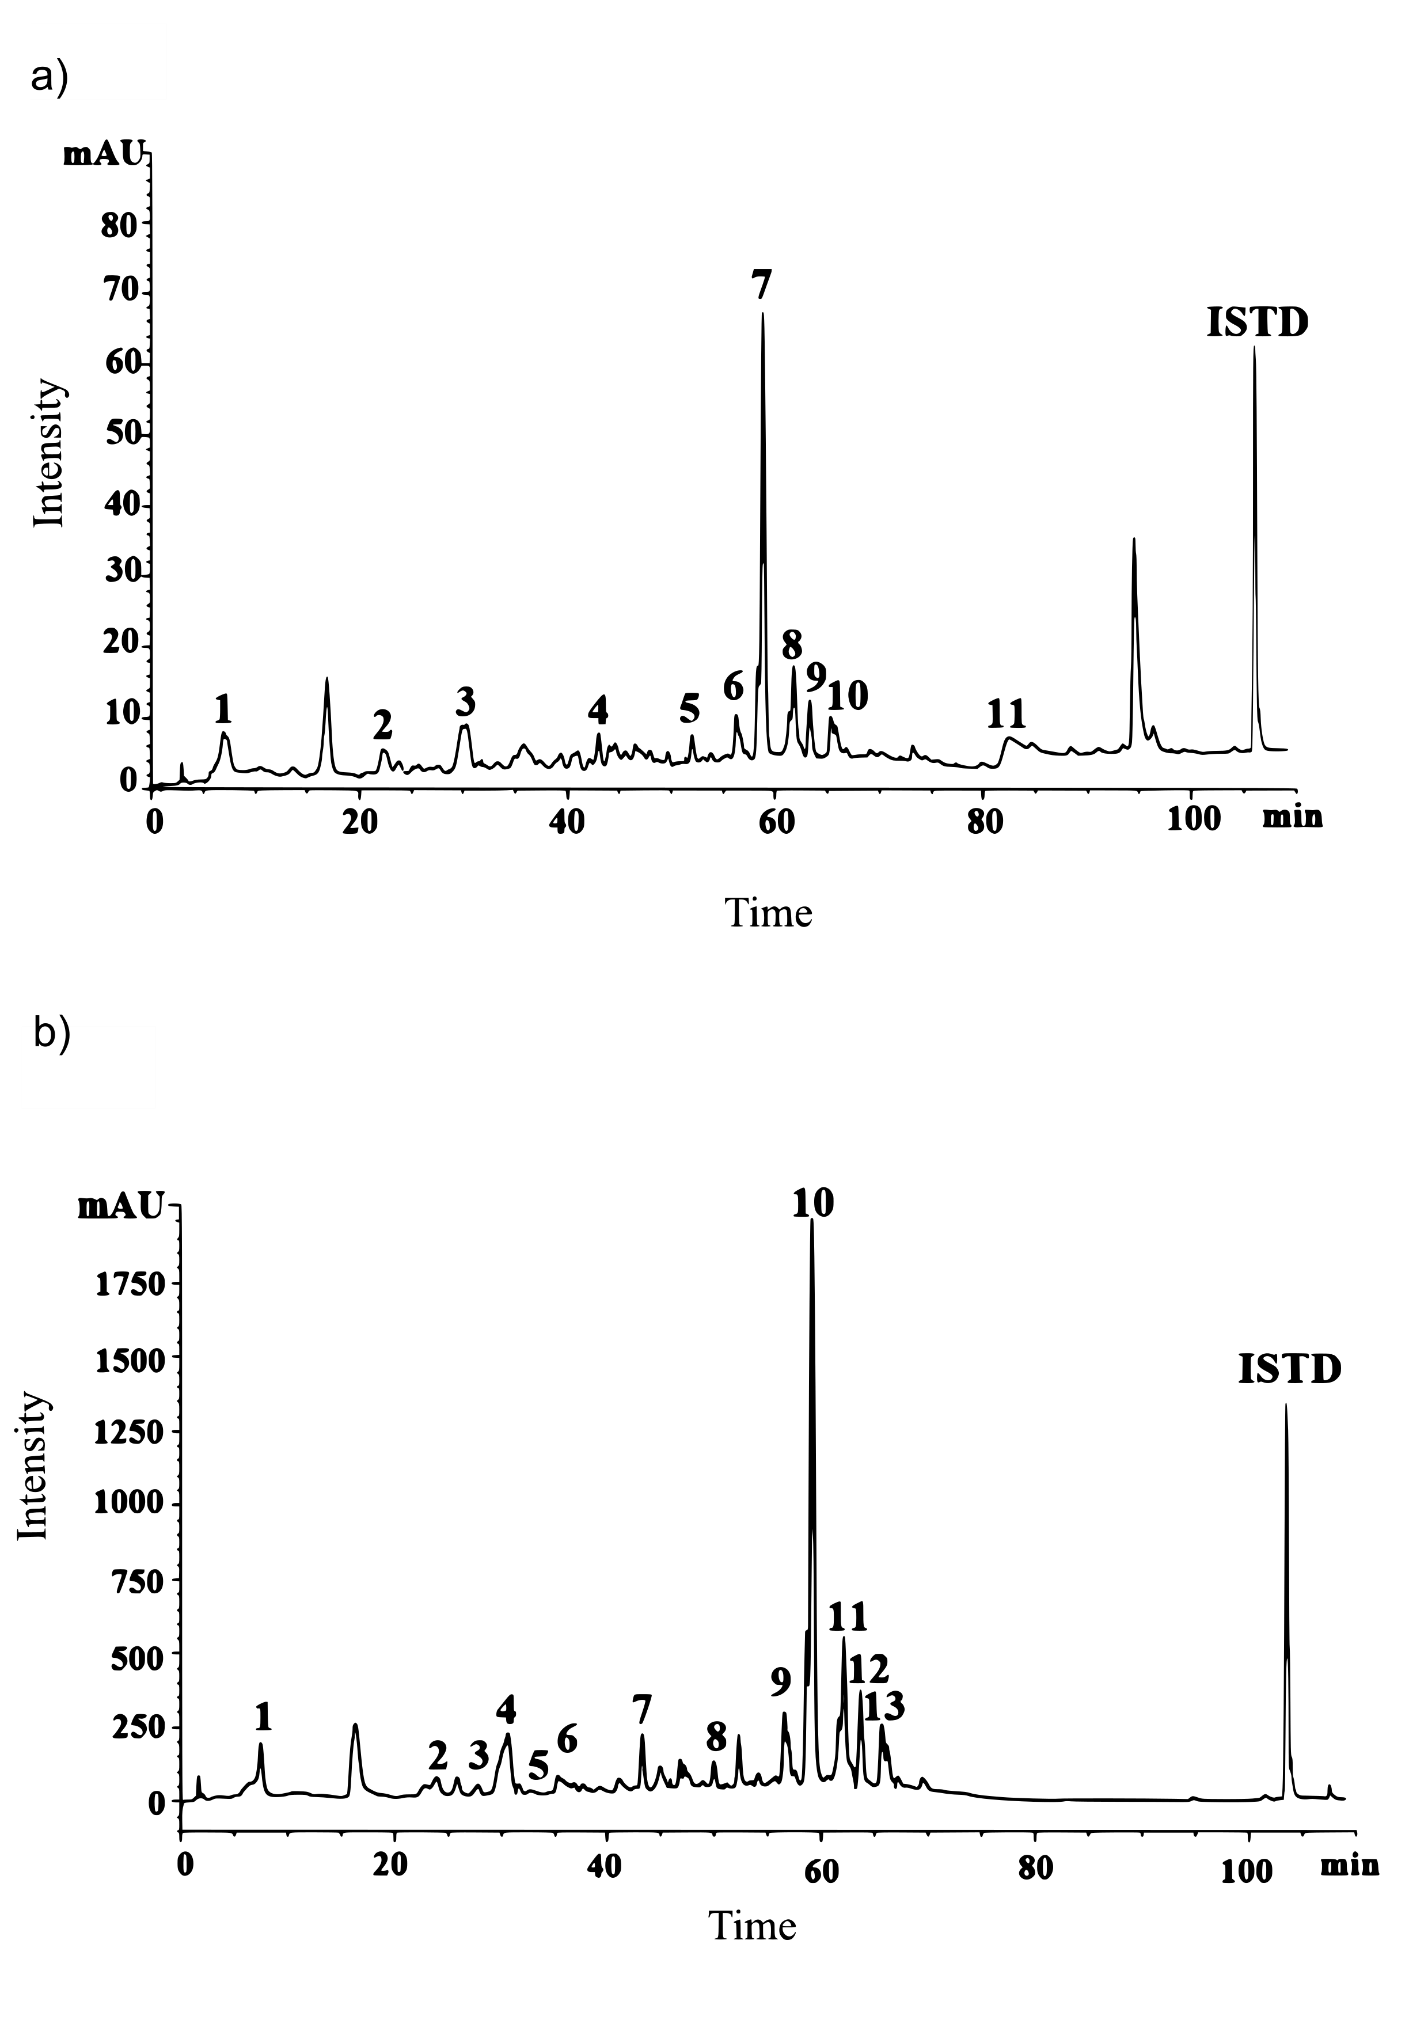


**Supplementary Figure 1.** Phenolic compounds of a) coconut meal and b) sesame meal extracts

a) (1) Gallic acid, (2) Chlorogenic acid, (3) *p*-Hydroxybenzoic acid, (4) Ferulic acid, (5), *p*-Coumaric acid, (6) Ellagic acid, (7) Daidzein, (8) Epigallocatechin, (9) Naringenin, (10) Genistein, (11), Apigenin

b) (1) Gallic acid, (2) Chlorogenic acid, (3) Catechin, (4) *p*-Hydroxybenzoic acid, (5) Caffeic acid, (6) Vanillic acid, (7) Syringic acid, (8) Ferulic acid, (9) Ellagic acid, (10) Daidzein, (11) Epigallocatechin, (12) Naringenin, (13) Genistein


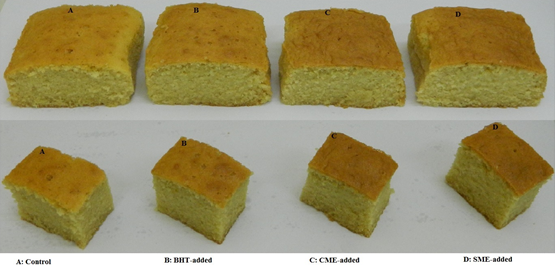


**Supplementary Figure 2.** Images of cakes prepared with and without antioxidants

**Supplementary Table 1**

Microbial counts of control and antioxidant added cake samples

| Aerobic plate count CFU/g cake | | | | | | | |
| --- | --- | --- | --- | --- | --- | --- | --- |
|  | Day 01 | Day 03 | Day 05 | Day 07 | Day 09 | Day 11 | Day 13 |
| Control | < 40 | < 40 | 414.5±123.74 | 479400±23617.37 | 4520000±381837 |  |  |
| BHT | < 40 | < 40 | < 40 | 227±136 | 947±272 | 149500±6363 | 38650000±5.16E+06 |
| Coconut | < 40 | < 40 | 60±14.14 | 135±92 | 105±7 | 43600±1272 | 16575000 ±1.66E+07 |
| Sesame | < 40 | < 40 | 90±14.14 | 209±12 | 699± 475 | 67750±18738 | 33800000±2.39E+07 |
| Yeast and mold count CFU/g cake | | | | | | | |
| Control | < 40 | < 40 | < 40 | 1004±211 | 11500±1979.89 |  |  |
| BHT | < 40 | < 40 | < 40 | 75±35 | 718±179 | 9725±389 | 1235000±63639 |
| Coconut | < 40 | < 40 | < 40 | 40±1 | 207±53 | 516±118 | 870000±155563 |
| Sesame | < 40 | < 40 | < 40 | 70±42 | 127± 52 | 686±44 | 255000±91923 |

Each data point represents mean±SD (n=3).
